# Supplementary material for: Mapping and annotating genomic loci to prioritize genes and implicate distinct polygenic adaptations for skin color
Source: PubMed Central journal article supplement (PMC11161515; doi:10.1038/s41467-024-49031-4), 2024-06-07
Supplement: 41467_2024_49031_MOESM1_ESM.pdf [file 41467_2024_49031_MOESM1_ESM.pdf]

1 **Supplementary Information**

2 **Supplementary Note**

3 **Genotype Quality Control (QC)**

4

5 **Supplementary Figures**

6 **Supplementary Fig. S1.** Correlation between skin color and covariates in 40,790 unrelated participants.

7 **Supplementary Fig. S2.** Distribution of sun exposure variables across different age groups.

8 **Supplementary Fig. S3.** Principal component analysis of genetic variants.

9 **Supplementary Fig. S4.** Principal component analysis of genetic variants in East Asian population.

10 **Supplementary Fig. S5.** Quantile-quantile plots of GWAS results.

11 **Supplementary Fig. S6.** Correlation between the effect size estimates in the discovery GWAS and  
12 variant loadings of the first 10 PCs.

13 **Supplementary Fig. S7.** Manhattan plots depicting the association between skin color traits and  
14 variants on chromosome X.

15 **Supplementary Fig. S8.** Regional plots of GWAS results for the (a) *GLIS1*, (b) *OCA2*, and (c) *MC1R*  
16 loci.

17 **Supplementary Fig. S9.** GWAS of categorical skin color using POLMM.

18 **Supplementary Fig. S10.** Comparison of the lead variants in the GWAS with discovery (*x*-axis) and  
19 replication set (*y*-axis).

20 **Supplementary Fig. S11.** Comparison of the lead variants from a 10-fold cross-validation of the  
21 GWAS for (a)  $L^*$ , (b)  $a^*$ , and (c)  $b^*$ .

22 **Supplementary Fig. S12.** The power adjusted transferability (PAT) ratio of the lead variants in  
23 replication cohort and 10-fold cross-validation of GWAS.

24 **Supplementary Fig. S13.** The number of significant loci that increases with increasing sample size in  
25 the permutation meta-analysis.

26 **Supplementary Fig. S14.** The median proportion of significant loci that increases with increasing  
27 sample size in the permutation meta-analysis.

28 **Supplementary Fig. S15.** The relative effect size for skin color traits for each quintile group of  
29 polygenic score.

30 **Supplementary Fig. S16.** Functional enrichment analysis of skin color trait-associated loci.

31 **Supplementary Fig. S17.** Regional plots of **(a)** GWAS results near *SPIRE2* and *MC1R* and **(b)** eQTL  
32 results of colocalized (PP.H4.abf > 0.7) genes near the corresponding loci.

33 **Supplementary Fig. S18.** Colocalization results.

34 **Supplementary Fig. S19.** Number of colocalized genes (PP.H4 > 0.8) in each tissue.

35 **Supplementary Fig. S20.** Batch effect correction using Harmony and gene expression patterns of skin  
36 cell-type markers.

37 **Supplementary Fig. S21.** Signals of polygenic adaptation for  $b^*$  and  $a^*$  across 1000 Genomes Project  
38 populations.

39 **Supplementary Fig. S22.** Interplay between polygenic score and sun exposure for **(a)**  $L^*$ , **(b)**  $a^*$ , and  
40 **(c)**  $b^*$ .

41 **Supplementary Fig. S23.** Normality of residuals for each skin color trait in a null model (a linear model  
42 with only covariates) assessed in each group **(a)** A and **(b)** B.

43

44 **Software URLs utilized in this study**

## 45 **Supplementary Note**

### 46 **Genotype quality control (QC)**

47 We performed QC in three steps prior to imputation: 1) first variant-level QC, 2) sample-level QC, and  
48 3) second variant-level QC.

49 For the first variant-level QC, variants with a call rate < 98% and duplicate variants with the same  
50 base-pair position were excluded. Variants with MAF < 1% or showing deviation from Hardy-Weinberg  
51 equilibrium ( $P < 1.0 \times 10^{-6}$ ) in unrelated samples from each population were excluded. The MAF  
52 calculation and Hardy-Weinberg equilibrium test of variants on chromosome X were performed only  
53 for female participants. Familial relationships among the study participants were estimated using KING  
54 (v.2.1)<sup>1</sup>, and 8,018 individuals with related individuals with second-degree or closer relationships were  
55 excluded to construct unrelated samples for variant-level QC. Sample-level QC was performed using  
56 the variants that passed the first variant-level QC. Samples were excluded based on the following  
57 criteria: call rate < 95% (251 individuals were excluded), heterozygosity rate three standard deviations  
58 away from the mean (319 individuals were excluded), and discordance between the reported and  
59 inferred sex based on the heterozygosity rate on chromosome X (276 individuals were excluded). After  
60 excluding these low-quality samples, second variant-level QC was performed using procedures  
61 identical to those used for the first QC with raw genotype data. In addition, variants that showed  
62 significant associations ( $P < 5.0 \times 10^{-8}$ ) with groups A and B were excluded to minimize the false  
63 positives due to batch effect. Associations of variants with each pair of genotype batches were tested  
64 using a logistic mixed model implemented in SAIGE (v.0.35.8)<sup>2</sup>.

65 Our samples were projected onto the principal component analysis plot of the 1000 Genomes  
66 Project phase 3 using eigenvectors from the 1000 Genomes Project samples (**Figure S4**). The Korean  
67 and Chinese participants in the present study overlapped with the cluster of East Asians in the 1000  
68 Genomes Project, although the study participants from undefined populations were relatively distant  
69 from the East Asian cluster. In addition, related samples were present among the study participants;  
70 therefore, we used a linear mixed model in the association analysis to adjust for population stratification  
71 and relatedness.

72 **References**

- 73 1. Manichaikul, A. *et al.* Robust relationship inference in genome-wide association studies.  
74 *Bioinformatics* **26**, 2867-73 (2010).
- 75 2. Zhou, W. *et al.* Efficiently controlling for case-control imbalance and sample relatedness in  
76 large-scale genetic association studies. *Nat Genet* **50**, 1335-1341 (2018).

77

78 **Supplementary Figures**

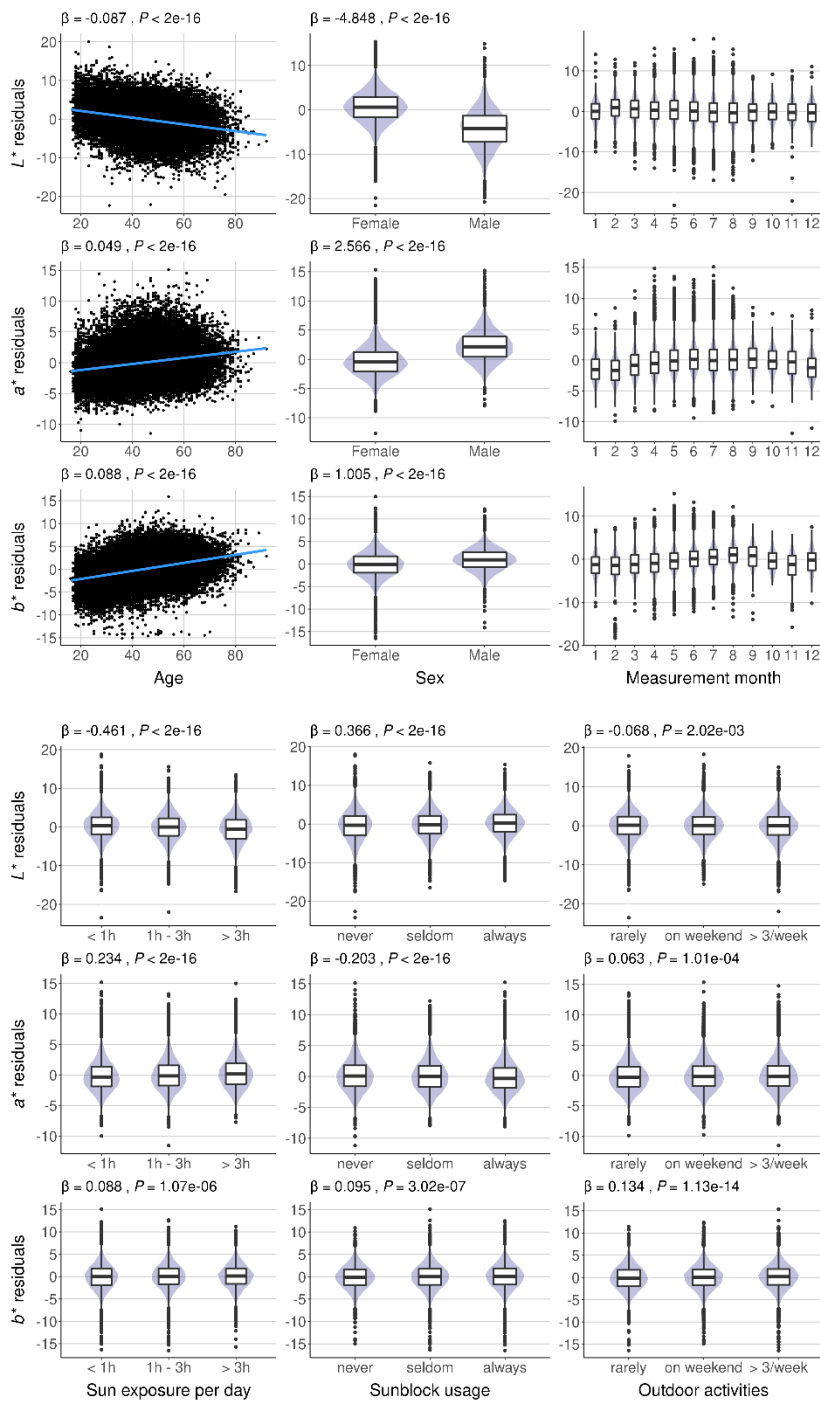

79

80 **Supplementary Fig. S1.** Correlation between skin color and covariates in 40,790 unrelated participants.  
 81 Prior to correlation analysis, the residual values (y axis) of each skin color were obtained using a linear  
 82 regression model adjusted for other covariates (x axis). Correlations between skin color and a  
 83 continuous covariate, age, are demonstrated using a regressed line (blue lines) in a scatter plot. Other  
 84 categorical covariates are presented as boxplots. Each plot presents the beta coefficient ( $\beta$ ) and P-value  
 85 ( $P$ ) from a linear regression model of the residual skin color (y axis) with the described covariate (x  
 86 axis) as explanatory variables.

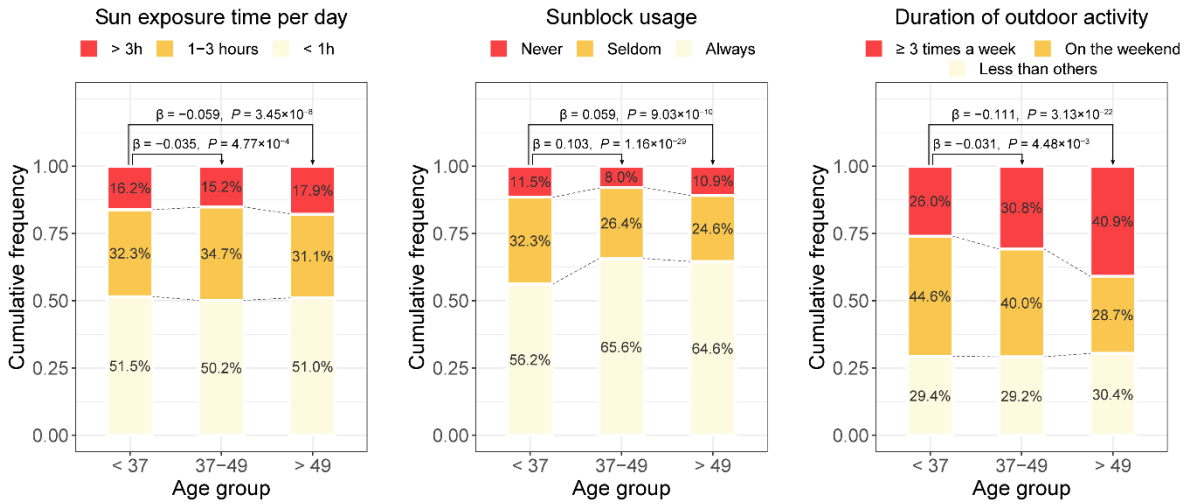

87

88 **Supplementary Fig. S2.** Distribution of sun exposure variables across different age groups. The  
 89 proportion of individuals for each sun exposure variable within each age group (young age [ $< 37$  years],  
 90 middle age [37 - 49 years]) and old age [ $> 49$  years] groups) is presented in the bar plot. Relative effect  
 91 size ( $\beta$ ) and  $P$ -value ( $P$ ) of each age group for sun exposure variable are presented above the bar plot.  
 92 The relative effect size was estimated using a linear regression model adjusted for the same covariates  
 93 as in the GWAS.

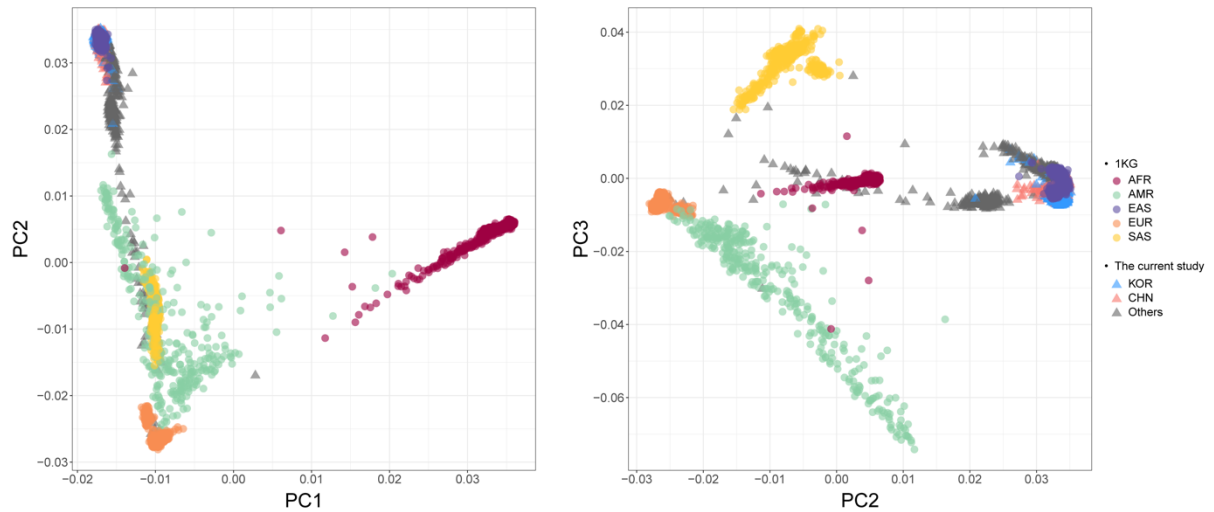

94

95 **Supplementary Fig. S3.** Principal component (PC) analysis of genetic variants. The first three PCs of  
 96 genetic ancestry are presented. Each dot represents an individual from a colored ethnic group. Principal  
 97 component analysis was conducted using the 1000 Genomes Project phase 3 samples (circles: AFR,  
 98 AMR, EAS, EUR, and SAS) and the PCs of the current study samples (triangles: KOR, CHN, and  
 99 others) were calculated using the eigenvectors from the 1000 Genomes Project phase 3.

100 Abbreviations: AFR, African and African American; AMR, Latin American; EAS, East Asian; EUR,  
 101 European; SAS, South Asian; KOR, Korean in the current study; CHN, Chinese in the current study.

102

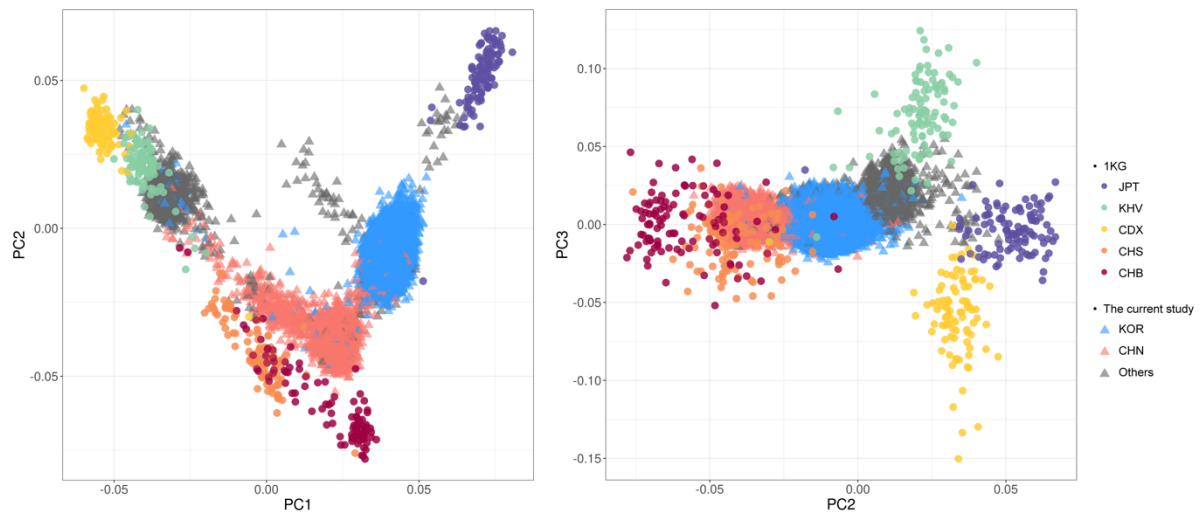

103

104 **Supplementary Fig. S4.** Principal component (PC) analysis of genetic variants in East Asian  
 105 population. The first three PCs of genetic ancestry are presented. Each dot represents an individual from  
 106 a colored ethnic group. Principal component analysis was conducted using East Asians from the 1000  
 107 Genomes Project phase 3 samples (circles: CDX, CHB, CHS, JPT, and KHV) and the PCs of the current  
 108 study samples (triangles: KOR, CHN, and others) were calculated using the eigenvectors from the 1000  
 109 Genomes Project phase 3.

110 Abbreviations: CDX, Chinese Dai in Xishuangbanna, China; CHB, Han Chinese in Beijing, China;  
 111 CHS, Han Chinese in Southern China; JPT, Japanese in Tokyo, Japan; KHV, Kinh in Ho Chi Minh  
 112 City, Vietnam; KOR, Korean in the current study; CHN, Chinese in the current study.



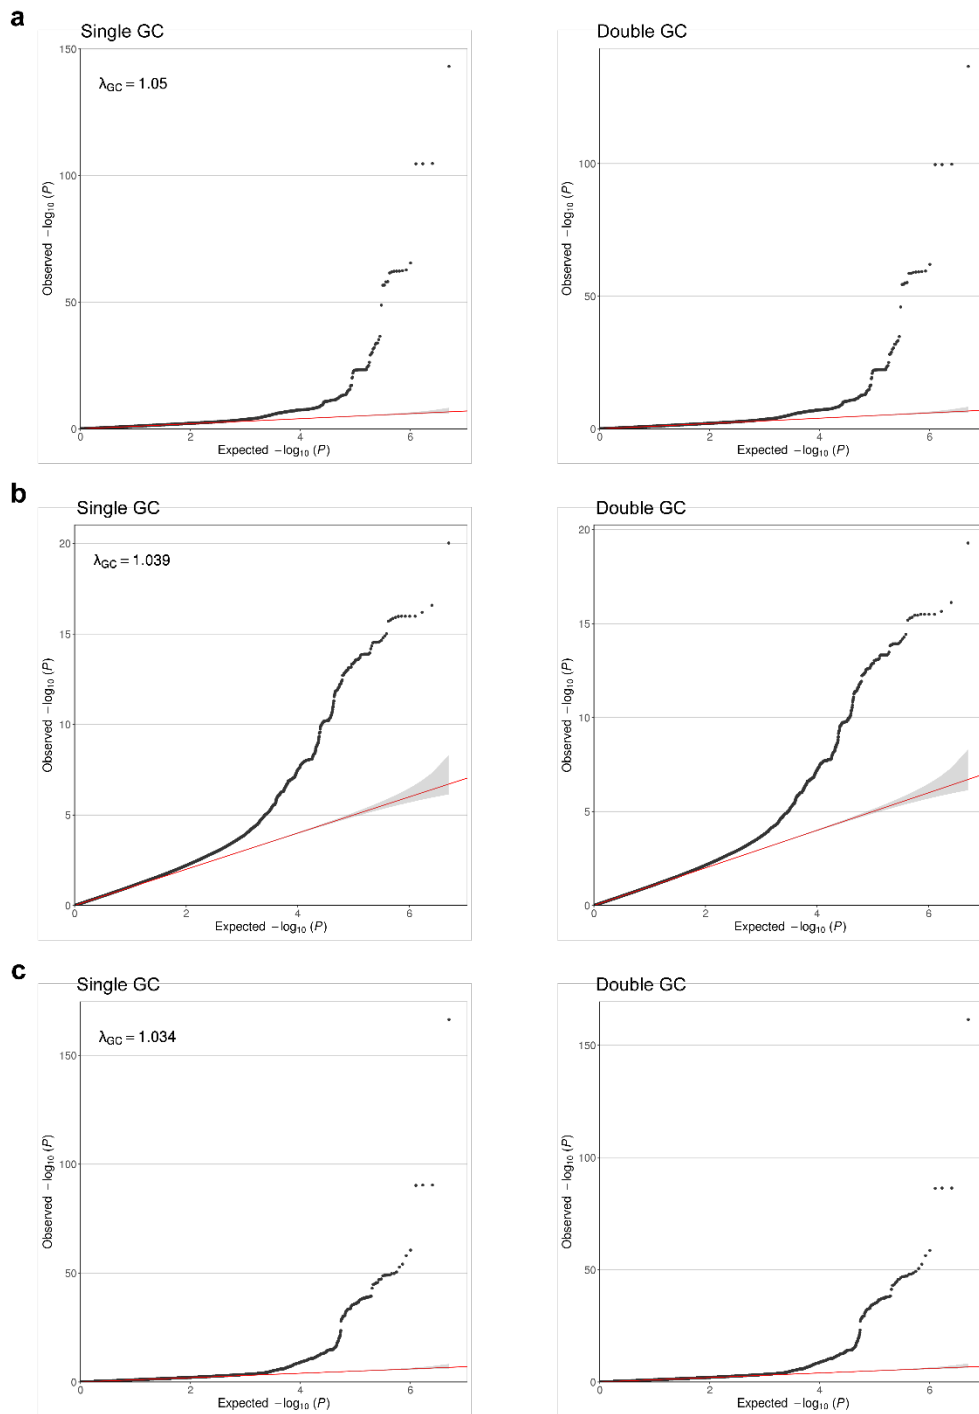

113

114 **Supplementary Fig. S5.** Quantile-quantile plots of GWAS results. Quantile-quantile plots of (a)  $L^*$ ,  
 115 (b)  $a^*$ , and (c)  $b^*$  GWAS results. Single genomic control results (left) and double genomic control  
 116 results (right) are shown in the plots of each skin color trait. Negative logarithms of the observed (y  
 117 axis) and expected (x axis)  $P$ -values are plotted for each SNP. The red line indicates the null hypothesis  
 118 of no true association ( $y = x$ ), and the gray region indicates the 95% confidence interval of the red line.  
 119 The genomic inflation factor ( $\lambda_{GC}$ ) before the second genomic control is shown in the upper left side of  
 120 the single genomic control figure.

121 Abbreviations: GC, genomic control.

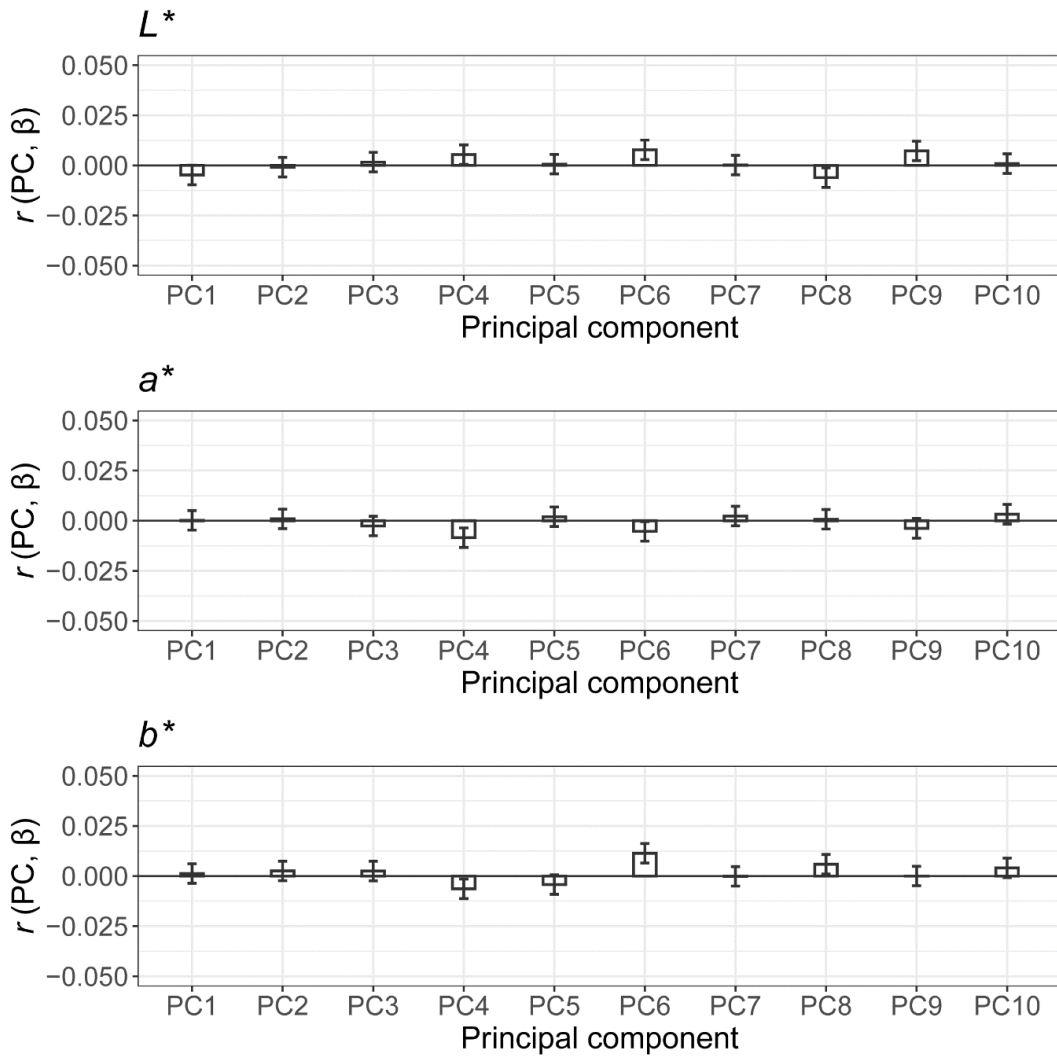

122

123 **Supplementary Fig. S6.** Correlation between the effect size estimates in the discovery GWAS and  
 124 variant loadings of the first 10 PCs. Error bars indicate 95% confidence intervals for the Pearson's  
 125 correlation coefficient.

126 Abbreviations:  $r(PC, \beta)$ , Pearson's correlation coefficient between variant loadings and the effect size.

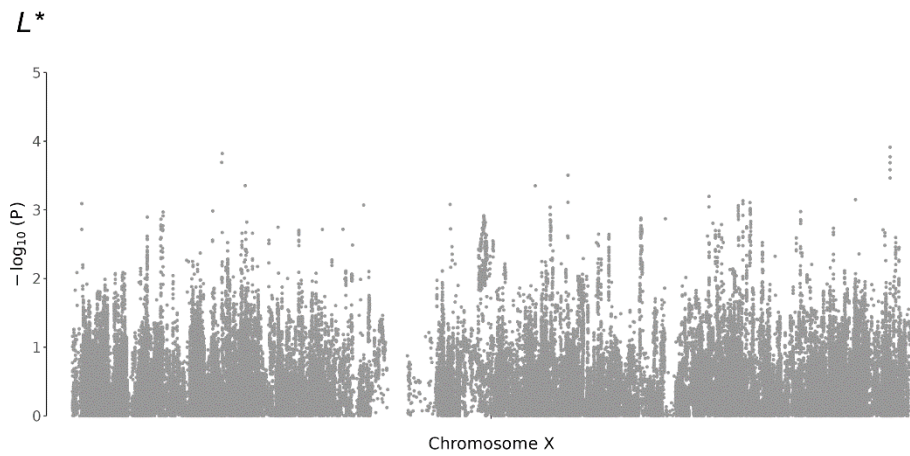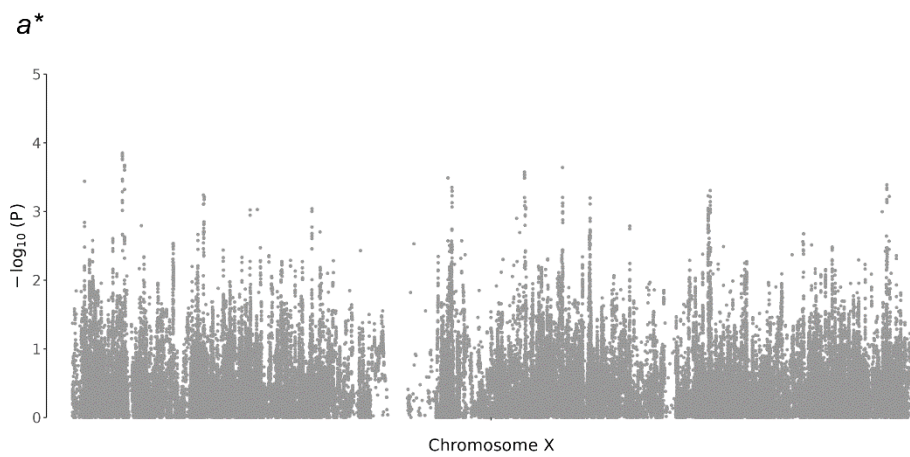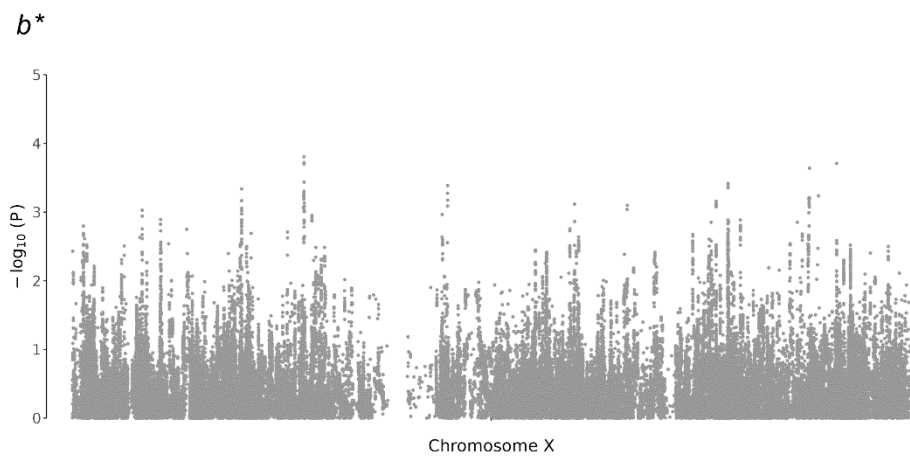

127

128 **Supplementary Fig. S7.** Manhattan plots depicting the association between skin color traits and  
129 variants on chromosome X. Each dot represents a variant plotted as  $-\log_{10}(P)$  on the  $y$ -axis against the  
130 corresponding variant position on the  $x$ -axis.

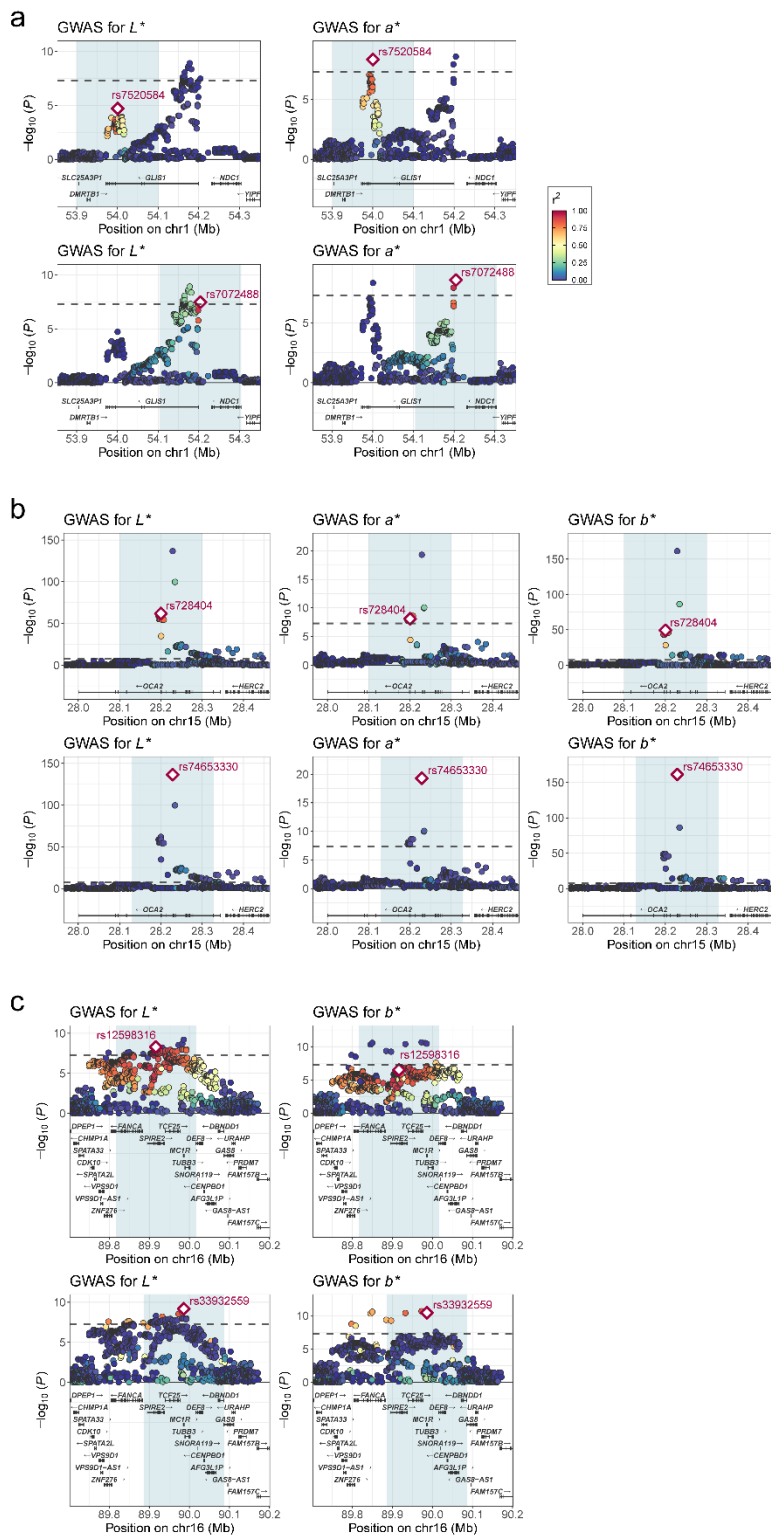

131

132 **Supplementary Fig. S8.** Regional plots of GWAS results on (a) *GLIS1*, (b) *OCA2*, and (c) *MC1R* loci,  
 133 which are colored based on different lead variants;  $\pm 250$  kb from lead variants in each locus. Each dot  
 134 represents a variant plotted as  $-\log_{10}(P)$  on the y-axis against the corresponding variant position (Mb)  
 135 on the x-axis and is colored according to linkage disequilibrium with the lead variant (rhombus). The  
 136 blue-shaded region was used for colocalization analysis ( $\pm 100$  kb).

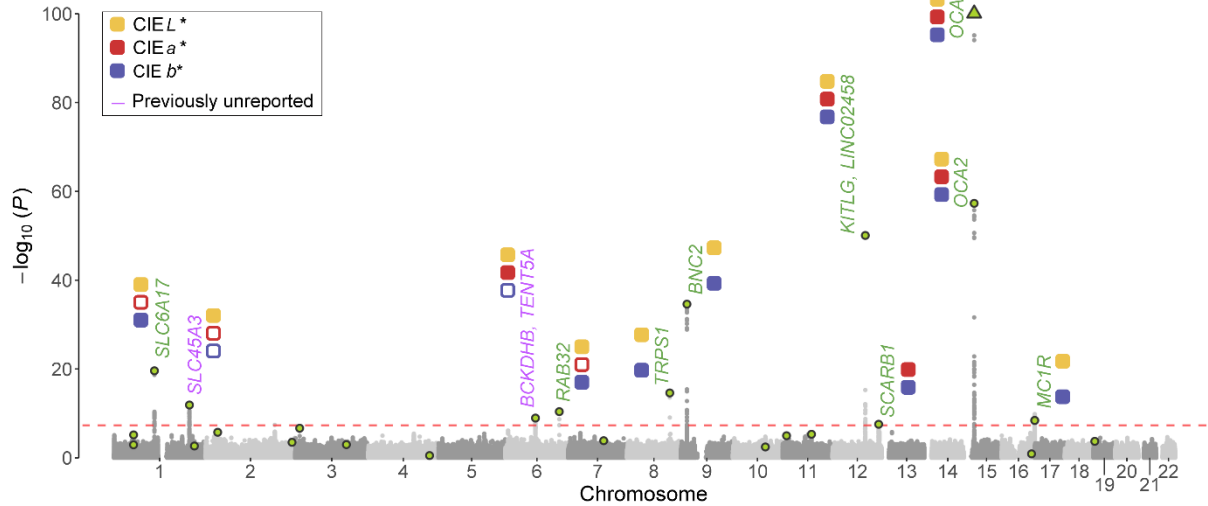

137

138 **Supplementary Fig. S9.** GWAS of categorical skin color using POLMM. The categorical skin color  
 139 was classified based on individual typology angle (ITA°) value, as illustrated in **Fig. 1c**. Manhattan plot  
 140 with  $-\log_{10}(P)$  is presented for categorical skin color. The red horizontal line corresponds to the genome-  
 141 wide significance threshold ( $P = 5 \times 10^{-8}$ ). Green dots indicate the lead variants in the discovery GWAS  
 142 of CIE LAB values. Genes in green and purple represent previously reported and unreported significant  
 143 loci, respectively. Boxes in yellow, red, and blue represent significant loci of  $L^*$ ,  $a^*$ , and  $b^*$ ,  
 144 respectively, in the discovery GWAS of CIE LAB values; solid boxes indicate genome-wide significant  
 145 loci, and boxes with colored borderlines indicate nominally significant loci ( $P < 2.17 \times 10^{-3}$ ,  
 146 Bonferroni's correction for 23 significant loci).

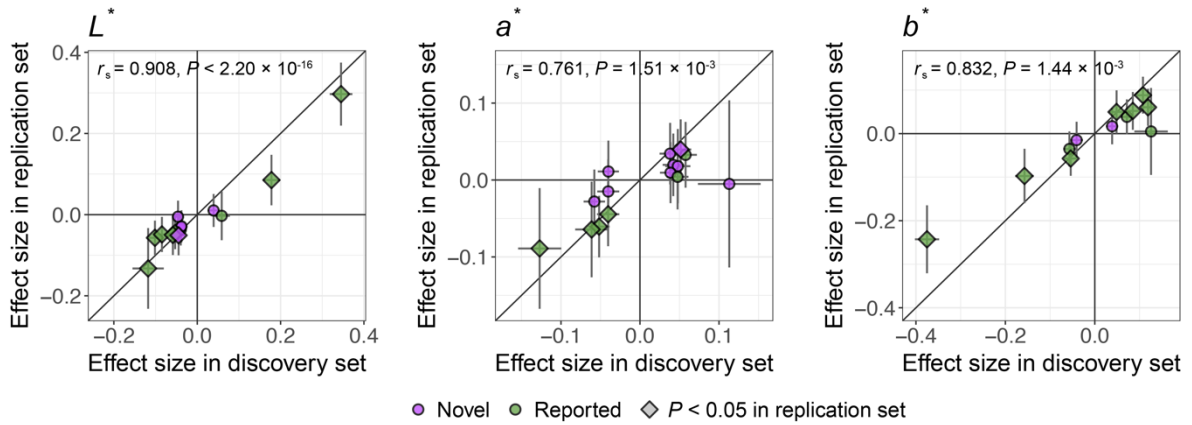

147

148 **Supplementary Fig. S10.** Comparison of the lead variants in the GWAS with discovery (x-axis) and

149 replication set (y-axis). Green and purple dots indicate the lead variants at previously reported and

150 unreported loci, respectively. Rhombus dots represent the lead variants with  $P < 0.05$  in the replication

151 set. Error bars indicate 95% confidence intervals for the effect size. Spearman's correlation ( $r_s$ ) between

152 effect sizes of lead variants is presented at the top of each plot.

a

Effect sizes from 10-fold cross validation of GWAS for  $L^*$

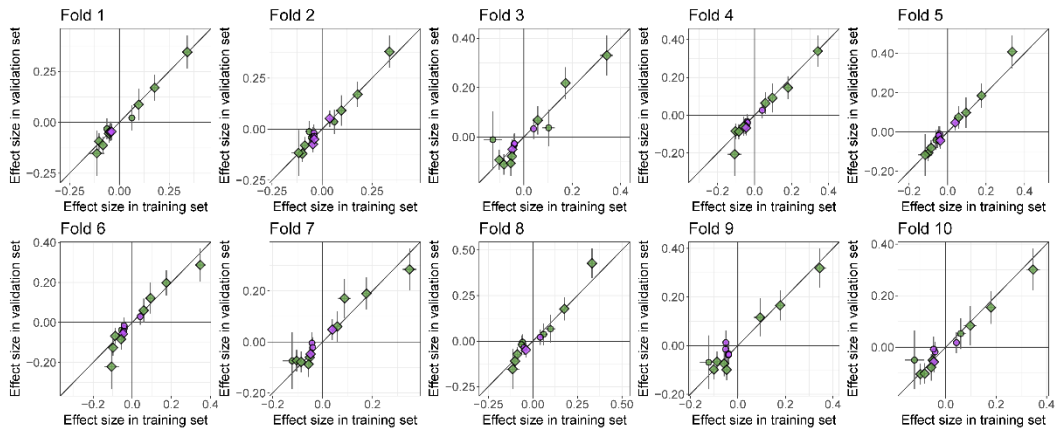

b

Effect sizes from 10-fold cross validation of GWAS for  $a^*$

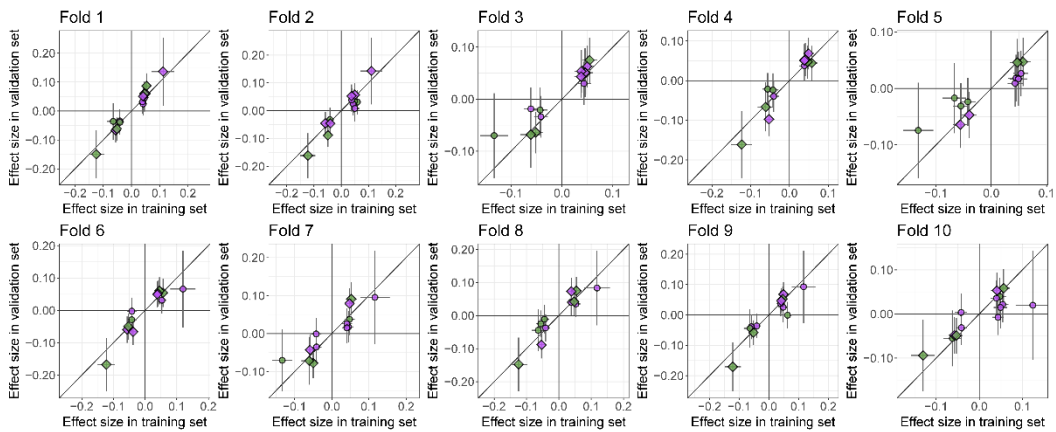

c

Effect sizes from 10-fold cross validation of GWAS for  $b^*$

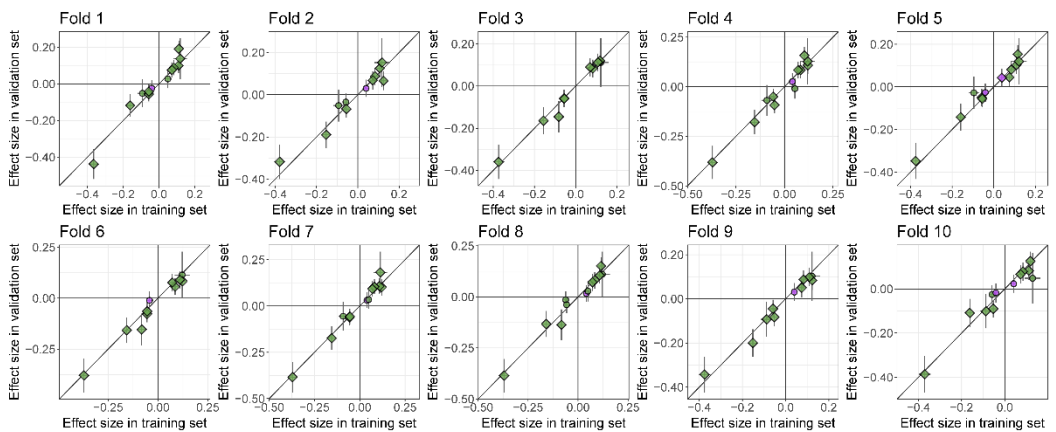

◆ Novel ◆ Reported

153

154 **Supplementary Fig. S11.** Comparison of the lead variants from a 10-fold cross-validation of the  
 155 GWAS for (a)  $L^*$ , (b)  $a^*$ , and (c)  $b^*$ . The effect size from the GWAS with training ( $x$ -axis) and  
 156 validation set ( $y$ -axis) in each fold are displayed. Green and purple dots indicate the lead variants at  
 157 previously reported and unreported loci, respectively. Rhombus dots represent the lead variants with  $P$   
 158  $< 0.05$  in the replication set. Error bars indicate 95% confidence intervals for the effect size.

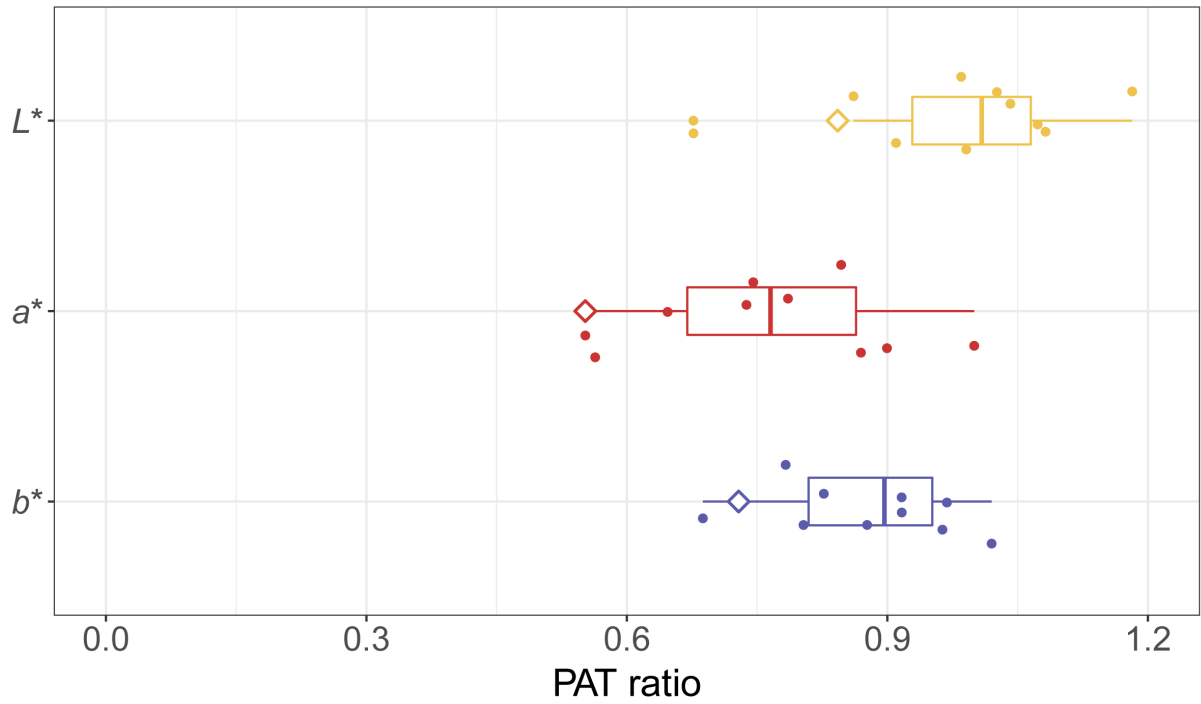

159

160 **Supplementary Fig. S12.** The power adjusted transferability (PAT) ratio of the lead variants in  
 161 replication cohort and 10-fold cross-validation of GWAS. Each dot indicates a PAT ratio calculated on  
 162 each fold of the cross-validation and a box plot shows the distribution of these ratios. A rhombus dot  
 163 indicates a PAT ratio calculated from the replication cohort.



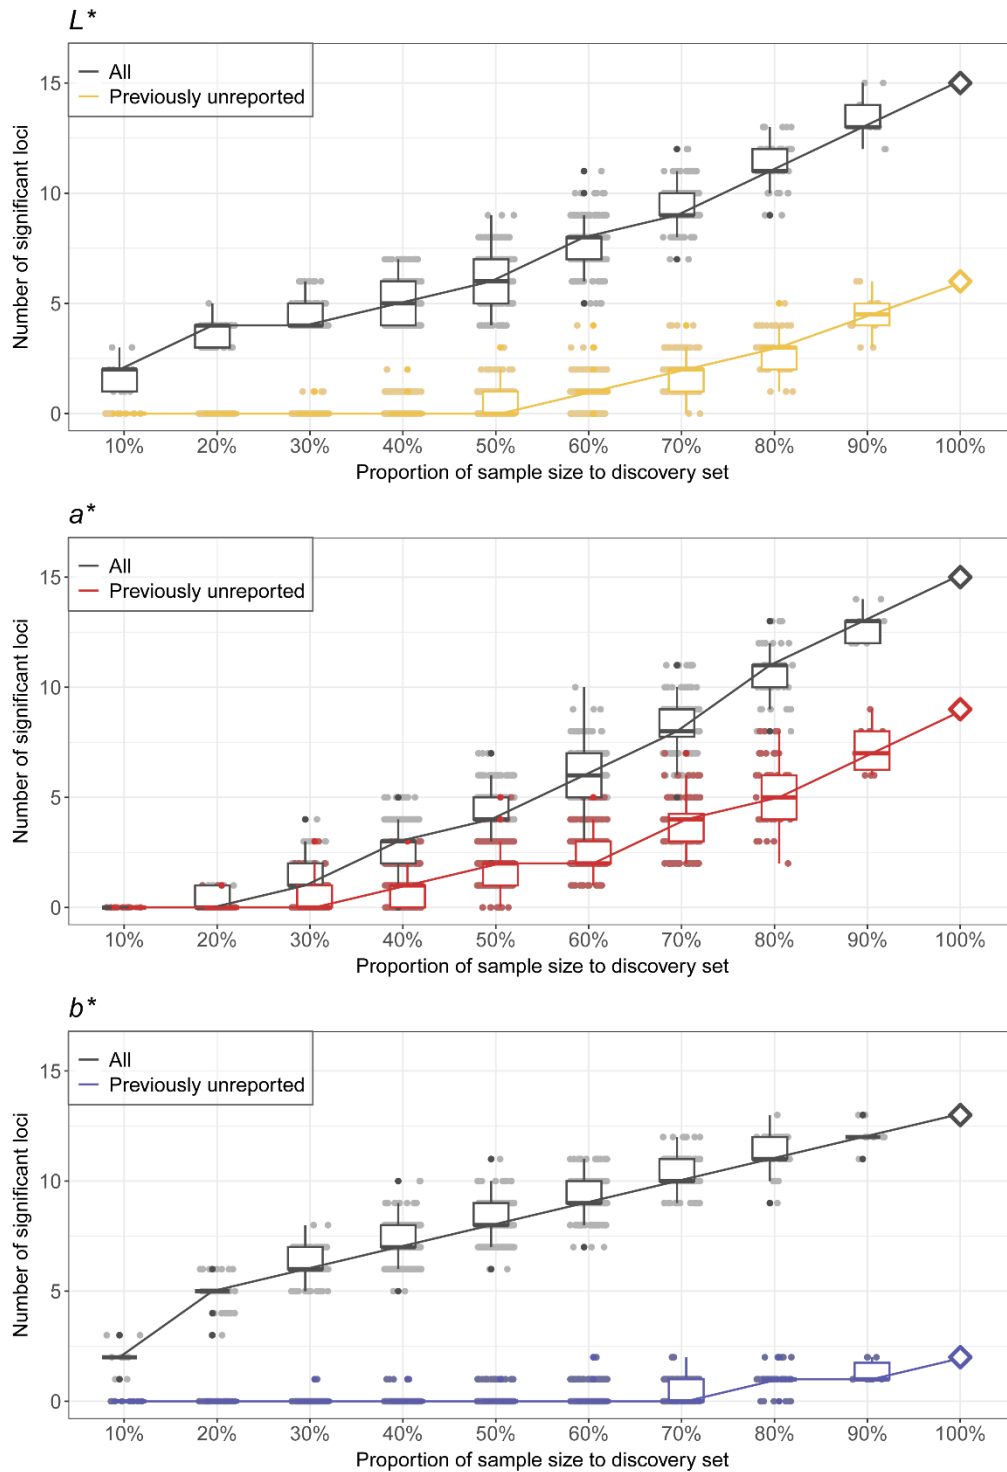

164

165 **Supplementary Fig. S13.** The number of significant loci that increases with increasing sample size in  
 166 the permutation meta-analysis. Gray dots represent the number of significant ( $P < 5.0 \times 10^{-8}$ ) loci ( $y$ -  
 167 axis) obtained from GWAS with varying sample size ( $x$ -axis). Colored dots ( $L^*$ , yellow;  $a^*$ , red;  $b^*$ ,  
 168 blue) represent the number of significant unreported loci. Each box plot represents the distribution of  
 169 number of significant loci with corresponding sample size and a line connects the median of each box  
 170 plot.

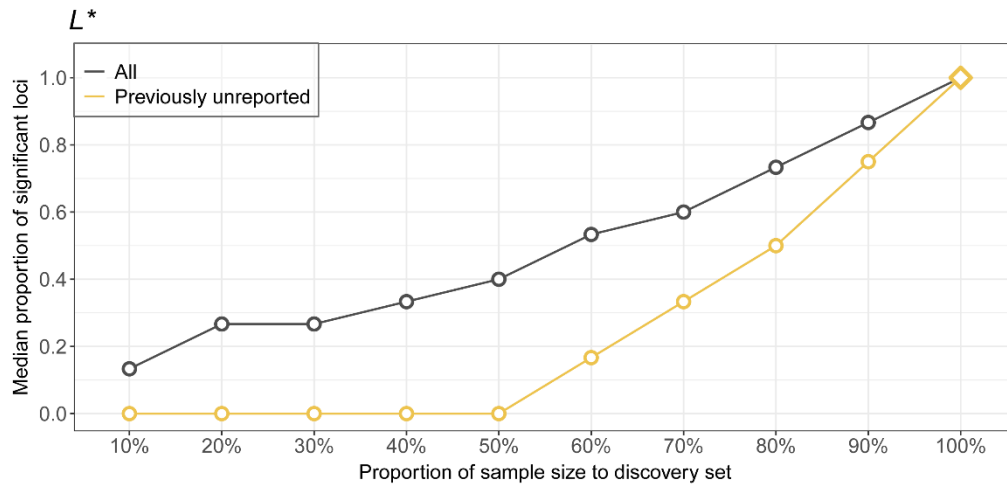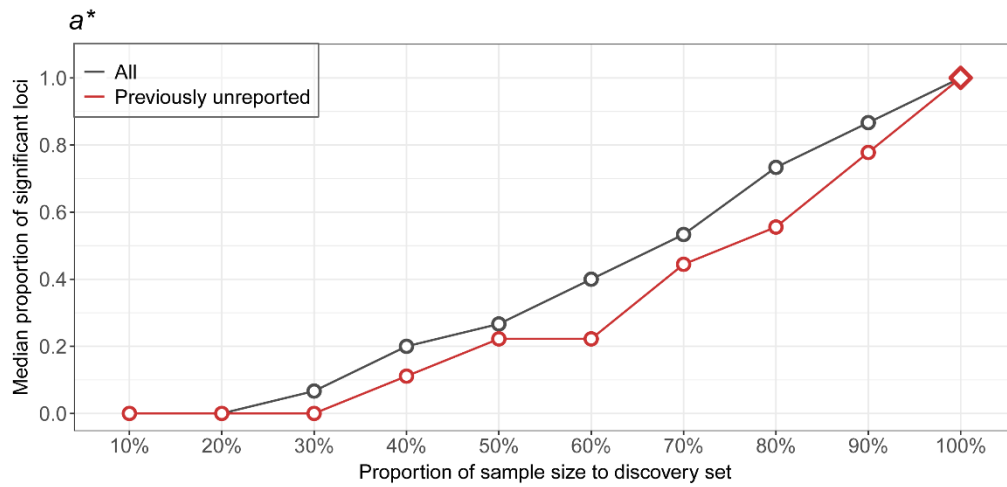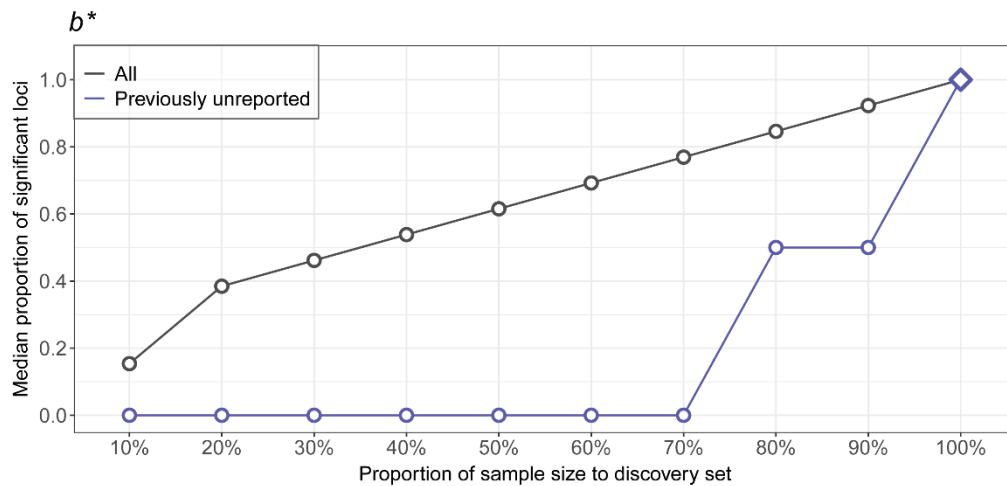

171

172 **Supplementary Fig. S14.** The median proportion of significant loci that increases with increasing  
 173 sample size in the permutation meta-analysis. Gray ( $L^*$ , yellow;  $a^*$ , red;  $b^*$ , blue) dots represent the  
 174 median proportion of significant ( $P < 5.0 \times 10^{-8}$ ) loci ( $y$ -axis) obtained from GWAS with varying sample  
 175 size ( $x$ -axis). Colored dots ( $L^*$ , yellow;  $a^*$ , red;  $b^*$ , blue) represent the median proportion of significant  
 176 unreported loci.

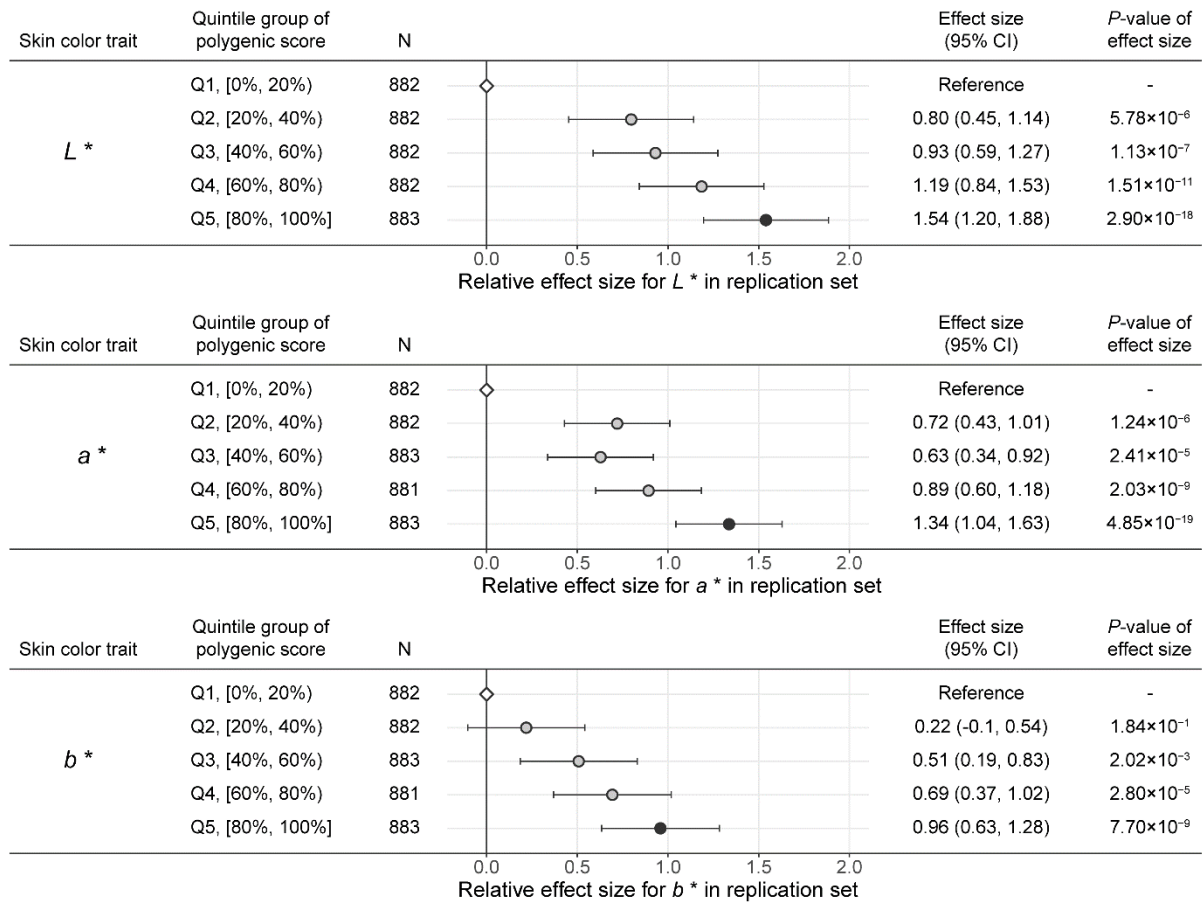

177

178 **Supplementary Fig. S15.** The relative effect size for skin color traits for each quintile group of

179 polygenic score. A rhombic dot represents a reference group. Each dot represents the relative effect size.

180 Error bars indicate 95% confidence intervals for the relative effect size.

181 Abbreviations: N, sample size; CI, confidence interval.

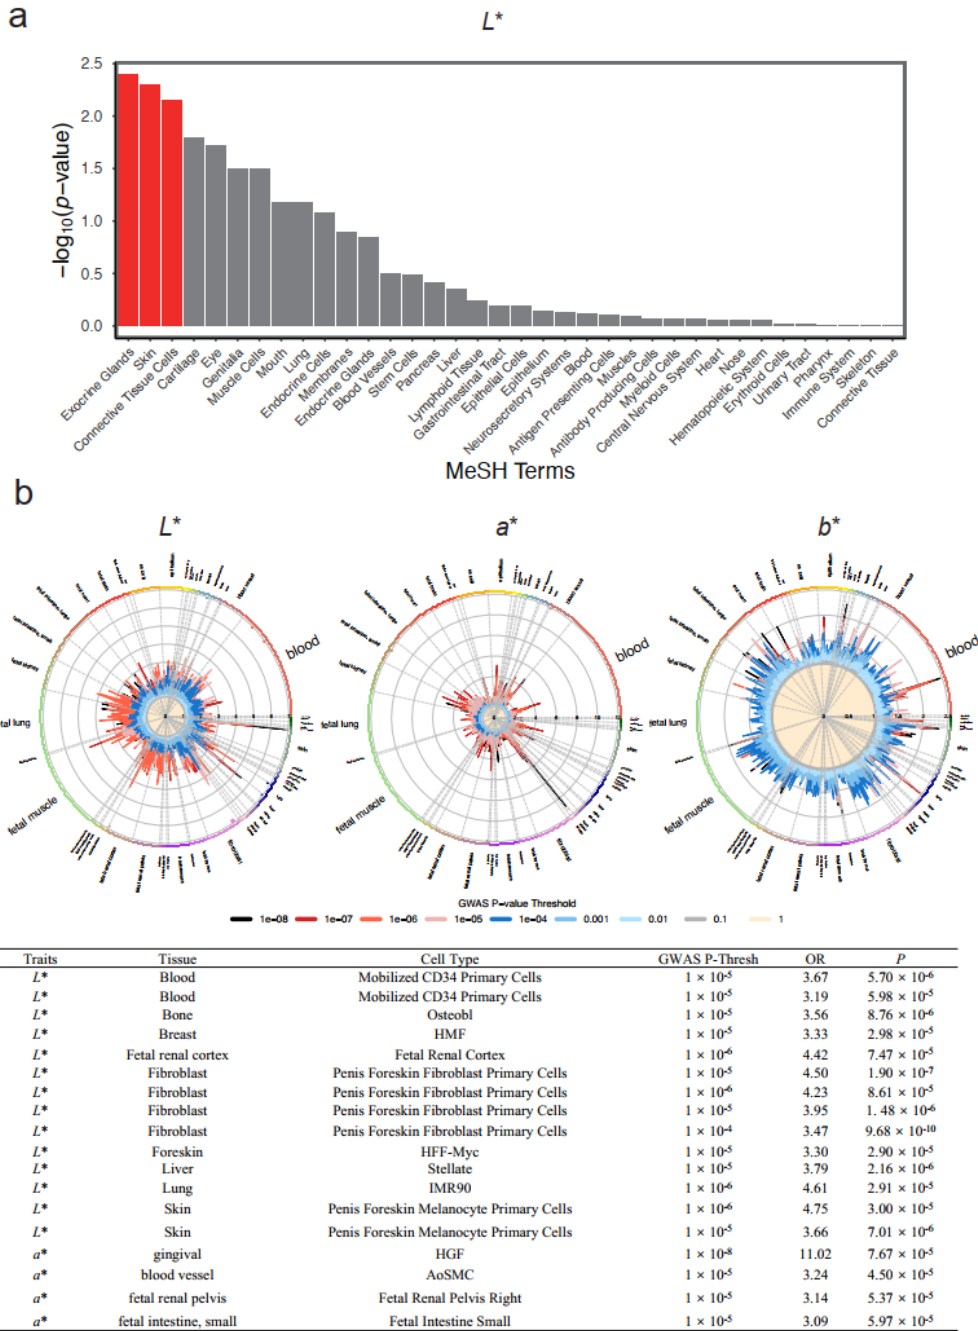

182

183 **Supplementary Fig. S16.** Functional enrichment analysis of skin color trait-associated loci. **a**, A bar  
 184 plot is presented with the  $-\log_{10}(P\text{-value})$  of the functional enrichment analysis results using DEPICT  
 185 for the GWAS of *L\**. Red bars indicate significant tissue types that reached a false discovery rate (*FDR*)  
 186 of  $< 0.1$ . *FDR* significance was calculated using 36 MeSH terms. **b**, Functional enrichment analysis  
 187 results obtained using GARFIELD for the GWAS of *L\**, *a\**, and *b\** are presented as circular plots and  
 188 tables. Radial lines represent the odds ratios of each cell type at nine GWAS *P*-value thresholds ( $T < 1$   
 189 to  $T < 10^{-8}$ ). The outermost circle represents the cell types colored by tissue type, and the tissue names  
 190 are shown outside the circle. The dots inside the outermost circle indicate significance. Significant cell  
 191 types are listed at the bottom of the table.

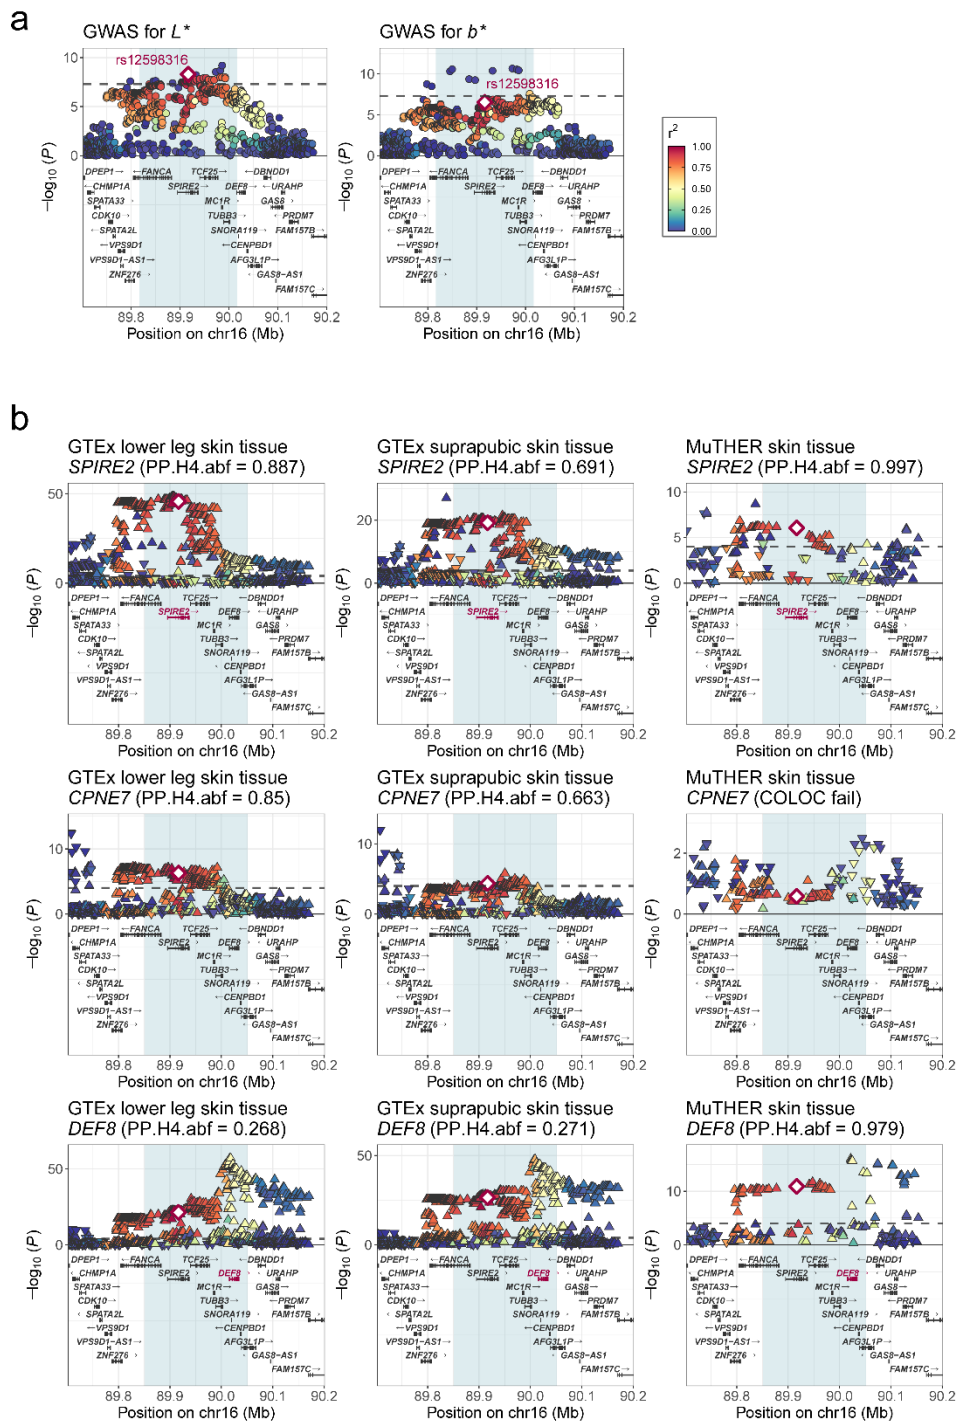

192

193 **Supplementary Fig. S17.** Regional plots of (a) GWAS results near *SPIRE2* and *MC1R* and (b) eQTL  
 194 results of colocalized (PP.H4.abf > 0.7) genes near the corresponding loci, which are colored based on  
 195 the lead variant on *SPIRE2*;  $\pm 250$  kb from lead variants in each locus. Each dot represents a variant  
 196 plotted as  $-\log_{10}(P)$  on the y-axis against the corresponding variant position (Mb) on the x-axis and is  
 197 colored according to linkage disequilibrium with the lead variant (rhombus). The blue-shaded region  
 198 was used for colocalization analysis ( $\pm 100$  kb).

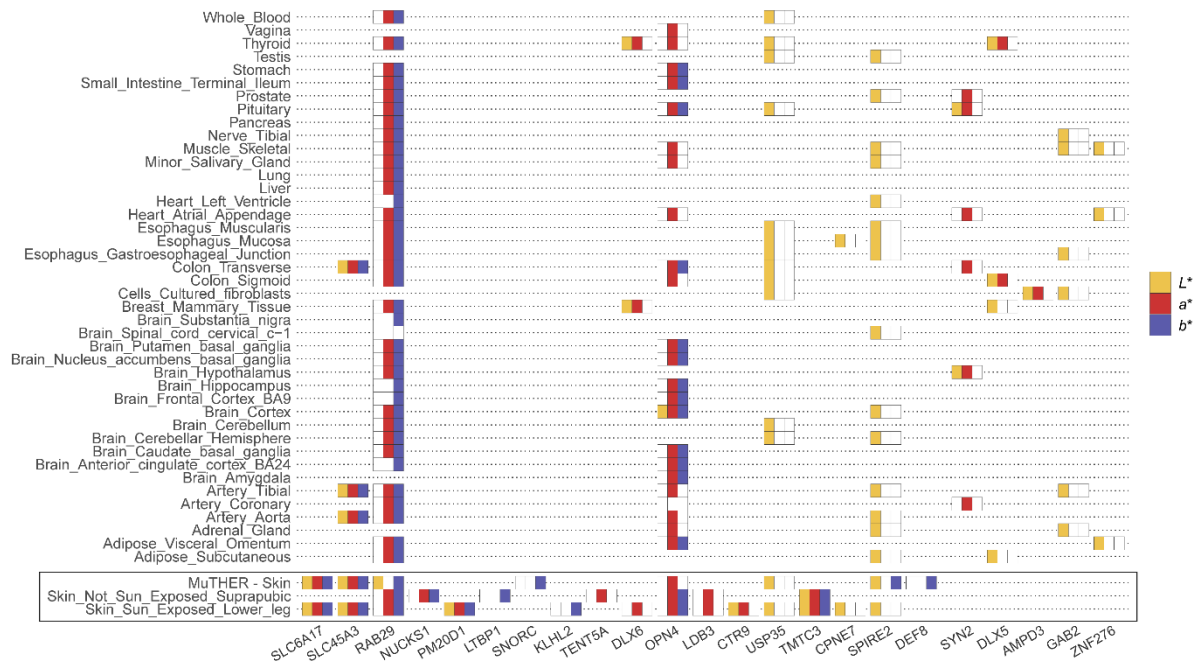



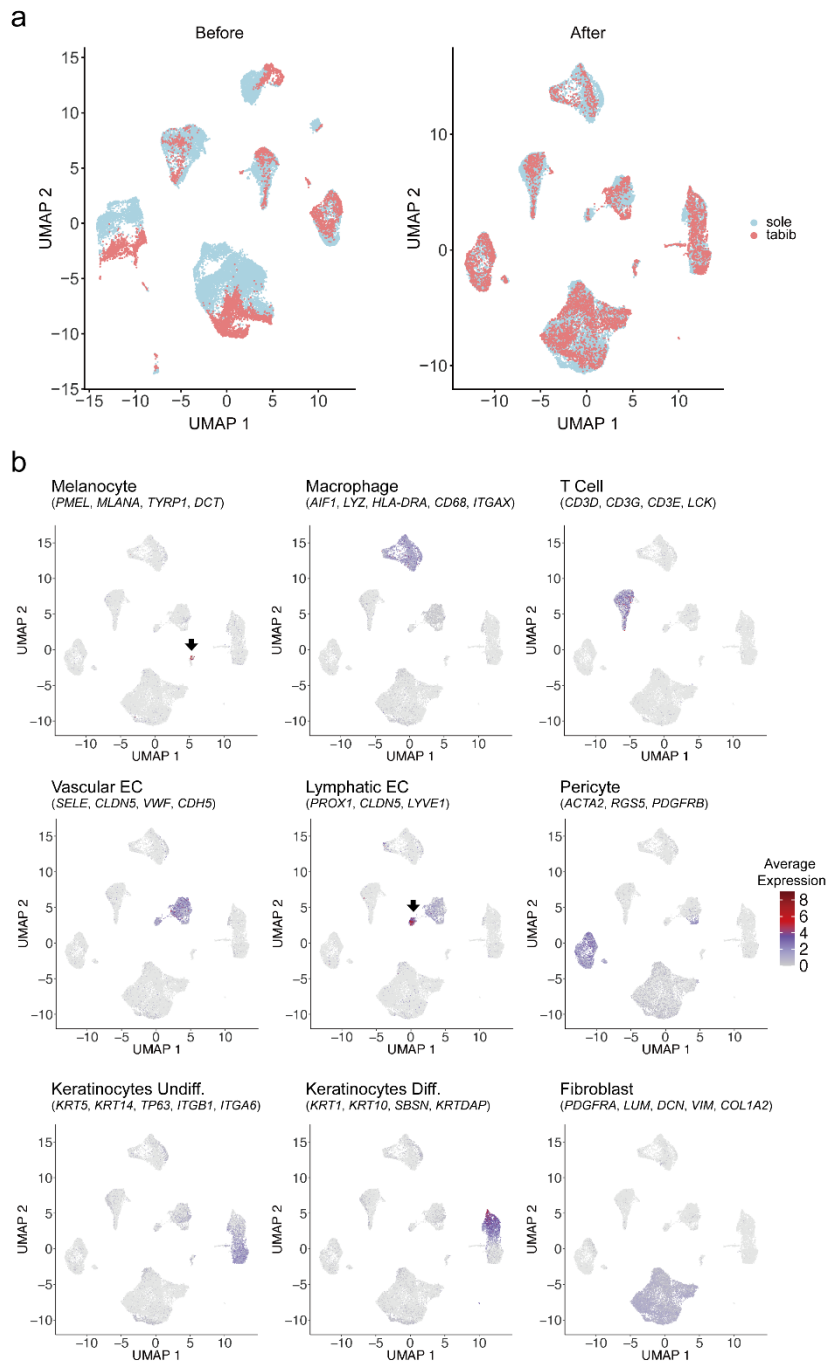

208

209 **Supplementary Fig. S20.** Batch effect correction for Harmony and gene expression patterns of skin  
 210 cell-type markers. **a**, UMAP plots are presented for comparison before and after batch effect correction  
 211 using Harmony. Red and blue points represent Sole et al. (2020), and Tabib et al. (2018) data,  
 212 respectively. **b**, UMAP plots showing the gene expression patterns of well-known cell type markers  
 213 with gene names in parentheses. Colors represent the average expression level of each cell type marker.  
 214 Arrows indicate clusters with a small number of cells (melanocytes and lymphatic ECs).  
 215 Abbreviations: Keratinocytes Diff., differentiated keratinocytes; Keratinocytes Undiff.,  
 216 undifferentiated keratinocytes; EC, endothelial cells.



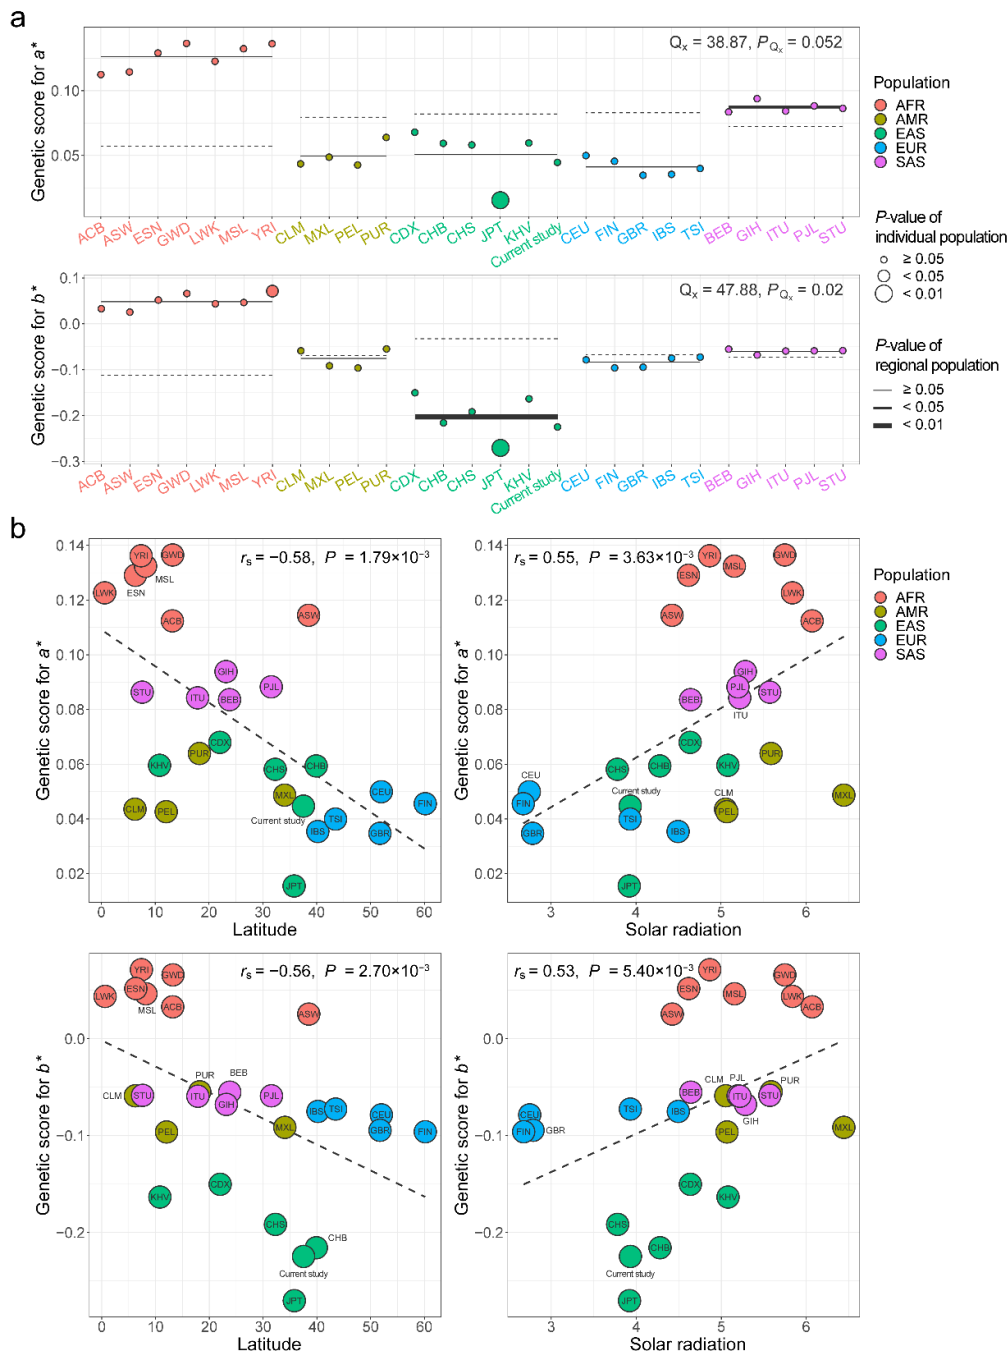

217

218 **Supplementary Fig. S21.** Signals of polygenic adaptation for  $b^*$  and  $a^*$  across the 1000 Genomes  
 219 Project populations. **a**, Distribution of estimated genetic scores for  $b^*$  (top) and  $a^*$  (bottom) across the  
 220 1000 Genomes Project populations. Test statistics for the overdispersion of genetic values ( $Q_x$ ) and  $P$ -  
 221 values are presented at the top of each plot. **b**, Estimated genetic scores for  $a^*$  and  $b^*$  plotted against  
 222 environmental factors: absolute latitude of each population (left) and annual solar radiation (right). The  
 223 regression lines (dashed lines) show the linearity between the genetic score ( $y$ -axis) and environmental  
 224 factors ( $x$ -axis). Spearman's correlation ( $r_s$ ) and  $P$ -values are presented at the top of each plot. The  $P$ -  
 225 value of Spearman's correlation coefficient was estimated under the null distribution of all possible  
 226 permutations.

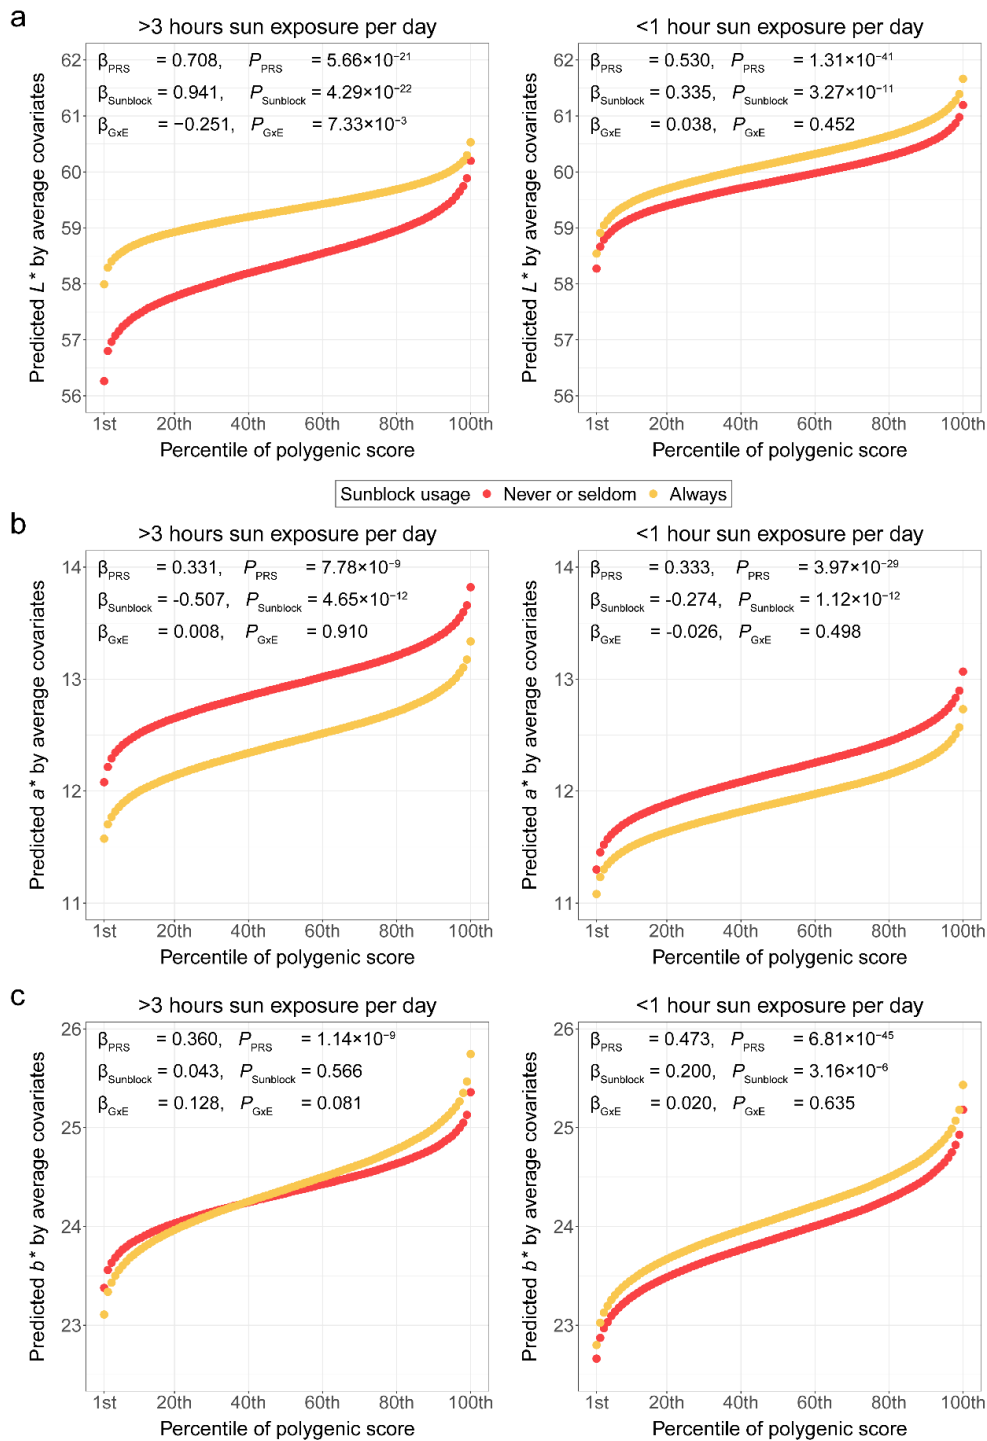

227

228 **Supplementary Fig. S22.** Interplay between polygenic score and sun exposure for (a)  $L^*$ , (b)  $a^*$ , and  
 229 (c)  $b^*$ . Predicted value by average covariates in each percentile of polygenic score distribution for  
 230 participants with never or seldom sunblock usage (red) and always sunblock usage (yellow) within each  
 231 group divided by sun exposure per day: more than 3 hour (left) and less than 1 hour (right). The effect  
 232 size ( $\beta_{G \times E}$ ) and  $P$ -values ( $P_{G \times E}$ ) of the interaction between the polygenic score and sunblock usage within  
 233 each sun exposure group are presented at the top of each plot.

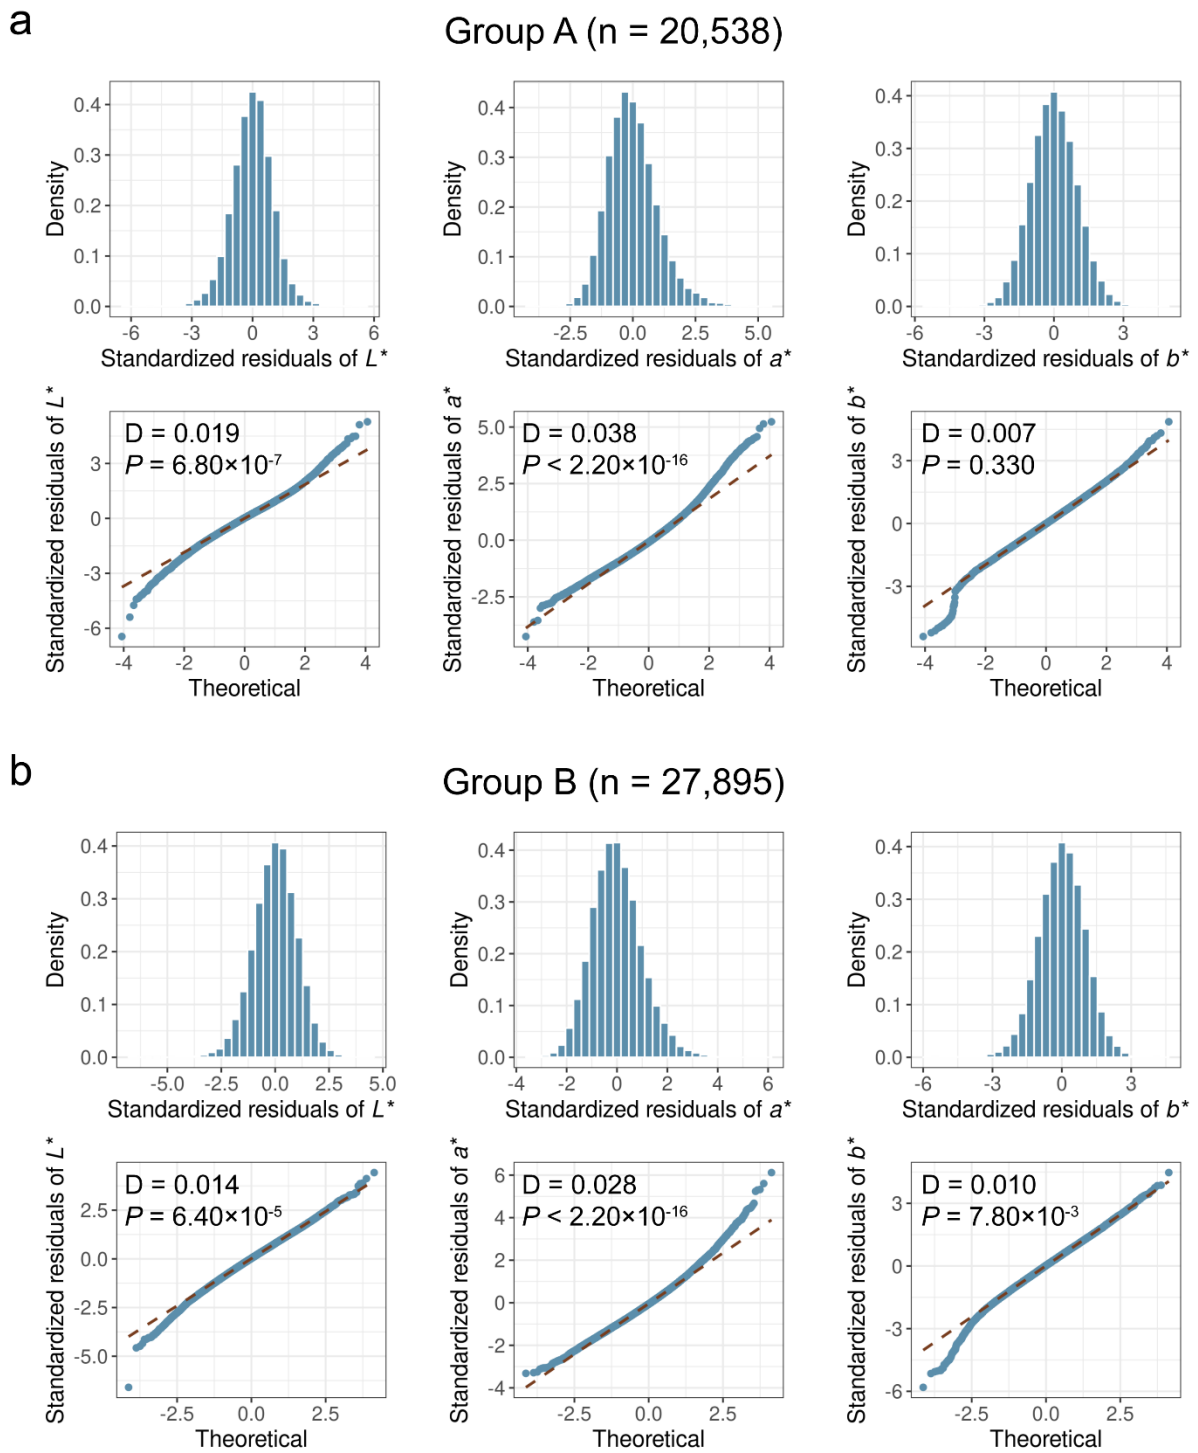

234

235 **Supplementary Fig. S23.** Normality of residuals for each skin color trait in a null model (a linear model

236 with only covariates) assessed in each group (a) A and (b) B. Age, sex, sun-exposure variables,

237 measurement month, genotyping batches, and the first 10 PCs of genetic ancestry were adjusted for the

238 null model. Distribution of residuals (top) and quantile-quantile plots (bottom) were described with test

239 statistic D and P-value of Kolmogorov-Smirnov test.

240 **Software URLs utilized in this study**

- 241 BOLT-LMM v.2.3.4, [https://alkesgroup.broadinstitute.org/BOLT-LMM/BOLT-LMM\\_manual.html](https://alkesgroup.broadinstitute.org/BOLT-LMM/BOLT-LMM_manual.html);
- 242 KING v.2.1, <https://www.kingrelatedness.com>;
- 243 SAIGE v.0.35.8, <https://github.com/weizhouUMICH/SAIGE>;
- 244 METAL (released on 2011-03-25), <https://genome.sph.umich.edu/wiki/METAL>;
- 245 PLINK v.1.90, <https://www.cog-genomics.org/plink>;
- 246 Eagle v.2.4.1, <https://alkesgroup.broadinstitute.org/Eagle>;
- 247 Minimac v.4, <https://github.com/statgen/Minimac4>;
- 248 GCTA v.1.91.2, <https://yanglab.westlake.edu.cn/software/gcta/#Overview>;
- 249 VEP v.98, <https://asia.ensembl.org/info/docs/tools/vep/index.html>;
- 250 POLMM (released on 2022-08-26), <https://wenjianbi.github.io/grab.github.io>;
- 251 DEPICT v.1.1, <https://github.com/perslab/depict>;
- 252 GARFIELD v.2, <https://annahutch.github.io/PhD/garfield.html>;
- 253 Polygenic adaptation (released on 2014-12-21), <https://github.com/jjberg2/PolygenicAdaptationCode>;
- 254 PRS-CS (released on 2021-06-04), <https://github.com/getian107/PRSes>;
- 255 coloc v5.1.1, [https://chrswallace.github.io/coloc/articles/a01\\_intro.html](https://chrswallace.github.io/coloc/articles/a01_intro.html);
- 256 Seurat v.3.2.3, <https://satijalab.org/seurat>.
